# Supplementary material
Source: PubMed Central journal article supplement (PMC6408897)
Supplement: rspb20182778supp2.pdf [file rspb20182778supp2.pdf]

ESM Table 1. Comparison of the reported findings of published articles testing for transgenerational effects of nutrition in life-history traits of *Drosophila melanogaster*. (The specific composition of ‘standard diet’ differs among studies, and in some cases, is not specified. Ingredients sometimes included in *Drosophila* media as preservatives, such as MgSO<sub>4</sub>, CaCl<sub>2</sub>, propionic acid or Nipagin, have also not been included to save space. DGRP, *Drosophila* Genetic Reference Panel [45]. DSPR, *Drosophila* Synthetic Population Resource [1].

| number of genetic lines                                       | generations | trials | standard food                          | diet treatment                                                                | grandparents diet | outcomes                                                                                                                                                                                       | reference |
|---------------------------------------------------------------|-------------|--------|----------------------------------------|-------------------------------------------------------------------------------|-------------------|------------------------------------------------------------------------------------------------------------------------------------------------------------------------------------------------|-----------|
| 1                                                             | $F_1$       | 1      | agar-banana-barley flour-jaggery-yeast | standard, rich (2x yeast)<br>poor (no yeast, no jaggery, 2x flour, 2x banana) | same              | female $F_0$ fed poor food laid heavier eggs than rich-fed $F_0$ (insignificant), and had offspring that survived better on rich food. No effects on mass                                      | [15]      |
| 2 lines (one control, one selected for starvation resistance) | $F_0, F_1$  | 1      | cornmeal-molasses-yeast                | standard or no food (water-saturated plug) during adult period                | same              | $F_0$ females (from both control line and starvation resistance line), that were starved as adults for 28 h, birthed $F_1$ females that had more ovarioles compared to unstarved $F_0$ females | [17]      |
| 1                                                             | $F_0, F_1$  | 2      | cornmeal-yeast-sucrose-glucose         | standard<br>poor (75% less sucrose, 80% less glucose, 75% less dry)           | same              | no diet-mediated parental effects on body size or L1-adult development duration<br>females raised on poor food laid larger eggs than females raised on rich food                               | [16]      |

|                                   |                 |   |                             |                                                                                                          |                    |                                                                                                                                                                                                                                                                                                                                              |      |
|-----------------------------------|-----------------|---|-----------------------------|----------------------------------------------------------------------------------------------------------|--------------------|----------------------------------------------------------------------------------------------------------------------------------------------------------------------------------------------------------------------------------------------------------------------------------------------------------------------------------------------|------|
|                                   |                 |   |                             | yeast, 75% less cornmeal)                                                                                |                    | LP-adult pupal duration unaffected by parental effects or diet                                                                                                                                                                                                                                                                               |      |
| 1                                 | $F_0, F_1$      | 1 | agar-cornmeal-yeast-syrup   | standard food<br>Poor (-87.5% yeast)                                                                     | different and same | female $F_0$ fed poor diet birthed larger $F_1$ females that develop slower. Male $F_0$ fed poor diet sired larger $F_1$ males                                                                                                                                                                                                               | [13] |
| 10 wild-collected isofemale lines | $F_0, F_1$      | 1 | agar-cornmeal-yeast-sucrose | (LP) low protein (+60% sucrose, -60% less yeast)<br>(HP) high yeast (-60% less sucrose, +60% more yeast) | same               | there were genotype-specific effects, but one prominent pattern was reported: $F_1$ females from HP parents developed more quickly, were heavier, laid more eggs, and had more standing protein and triglycerides. $F_1$ males developed at a similar rate, no effects on weight, but had higher standing protein when $F_0$ parents were LP | [11] |
| 1                                 | $F_0, F_1, F_2$ | 1 | cornmeal-molasses           | (LS) low sugar (0.15 mol l <sup>-1</sup> )                                                               | different and same | $F_1$ male and female $F_1$ offspring whose mothers ate HS food accumulated triglycerides quickly, stored less                                                                                                                                                                                                                               | [12] |

|                                                                       |                 |   |                   |                                                         |                    |                                                                                                                                                                                        |                      |
|-----------------------------------------------------------------------|-----------------|---|-------------------|---------------------------------------------------------|--------------------|----------------------------------------------------------------------------------------------------------------------------------------------------------------------------------------|----------------------|
|                                                                       |                 |   |                   | (HS) high sugar (1 mol l <sup>-1</sup> )                |                    | cholesterol, and had altered regulation of metabolic genes; these patterns were consistent for $F_2$                                                                                   |                      |
| 4 and 10 randomly selected DGRP lines; 3 randomly selected DSPR lines | $F_0, F_1, F_2$ | 1 | cornmeal-molasses | standard high fat (standard + 3% coconut oil by weight) | different and same | genotype-specific effects, for at least one of two descendant generations, of fat treatment on trehalose, protein, and triglyceride levels, female and male pupal weight, and egg size | [14]<br>(DGRP; DSPR) |

## Reference

1. King EG, Macdonald SJ, Long AD. 2012 Properties and power of the *Drosophila* Synthetic Population Resource for the routine of complex traits. *Genetics* **191**, 935-949.
